# Supplementary material for: Iron-catalyzed carbene and carbene radical cascade reactions: Mechanistic study and synthetic applications
Source: Research Square preprint supplement (doi:10.21203/rs.3.rs-5669760/v1), 2025-01-30

## checkCIF/PLATON report

Structure factors have been supplied for datablock(s) g170918a

THIS REPORT IS FOR GUIDANCE ONLY. IF USED AS PART OF A REVIEW PROCEDURE FOR PUBLICATION, IT SHOULD NOT REPLACE THE EXPERTISE OF AN EXPERIENCED CRYSTALLOGRAPHIC REFEREE.

No syntax errors found.      CIF dictionary      Interpreting this report

### Datablock: g170918a

---

|                        |                                        |                                |
|------------------------|----------------------------------------|--------------------------------|
| Bond precision:        | C-C = 0.0123 A                         | Wavelength=0.71073             |
| Cell:                  | a=12.4749(10)                          | b=15.2567(15)      c=30.993(3) |
|                        | alpha=90                               | beta=91.788(7)      gamma=90   |
| Temperature:           | 295 K                                  |                                |
|                        | Calculated                             | Reported                       |
| Volume                 | 5895.9(9)                              | 5895.9(9)                      |
| Space group            | P 21/c                                 | P 1 21/c 1                     |
| Hall group             | -P 2ybc                                | -P 2ybc                        |
| Moiety formula         | C64 H39 Br4 Cl Fe N4 O2 [+<br>solvent] | C64 H39 Br4 Cl Fe N4 O2        |
| Sum formula            | C64 H39 Br4 Cl Fe N4 O2 [+<br>solvent] | C64 H39 Br4 Cl Fe N4 O2        |
| Mr                     | 1306.89                                | 1306.93                        |
| Dx, g cm <sup>-3</sup> | 1.472                                  | 1.472                          |
| Z                      | 4                                      | 4                              |
| Mu (mm <sup>-1</sup> ) | 3.058                                  | 3.058                          |
| F000                   | 2600.0                                 | 2600.0                         |
| F000'                  | 2598.29                                |                                |
| h, k, lmax             | 14, 18, 36                             | 14, 18, 36                     |
| Nref                   | 10411                                  | 10396                          |
| Tmin, Tmax             | 0.485, 0.737                           | 0.562, 1.000                   |
| Tmin'                  | 0.461                                  |                                |

Correction method= # Reported T Limits: Tmin=0.562 Tmax=1.000

AbsCorr = MULTI-SCAN

Data completeness= 0.999

Theta(max)= 25.027

R(reflections)= 0.0788( 4872)

wR2(reflections)=  
0.2201( 10396)

S = 0.989

Npar= 686

---

The following ALERTS were generated. Each ALERT has the format

**test-name\_ALERT\_alert-type\_alert-level.**

Click on the hyperlinks for more details of the test.

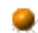

### Alert level B

PLAT910\_ALERT\_3\_B Missing # of FCF Reflection(s) Below Theta(Min).

15 Note

**Author Response: Beamstop theta-min limit set too high, large unit-cell etc**

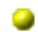

### Alert level C

CRYSC01\_ALERT\_1\_C The word below has not been recognised as a standard identifier.

dull

CRYSC01\_ALERT\_1\_C The word below has not been recognised as a standard identifier.

blackish

RINTA01\_ALERT\_3\_C The value of Rint is greater than 0.12

Rint given 0.137

|                                                                    |               |
|--------------------------------------------------------------------|---------------|
| PLAT020_ALERT_3_C The Value of Rint is Greater Than 0.12 .....     | 0.137 Report  |
| PLAT026_ALERT_3_C Ratio Observed / Unique Reflections (too) Low .. | 47% Check     |
| PLAT213_ALERT_2_C Atom Br3 has ADP max/min Ratio .....             | 3.3 prolat    |
| PLAT220_ALERT_2_C NonSolvent Resd 1 C Ueq(max)/Ueq(min) Range      | 3.5 Ratio     |
| PLAT234_ALERT_4_C Large Hirshfeld Difference C3 --C4 .             | 0.17 Ang.     |
| PLAT234_ALERT_4_C Large Hirshfeld Difference C21 --C22 .           | 0.16 Ang.     |
| PLAT234_ALERT_4_C Large Hirshfeld Difference C38 --C39 .           | 0.22 Ang.     |
| PLAT241_ALERT_2_C High 'MainMol' Ueq as Compared to Neighbors of   | C37 Check     |
| PLAT241_ALERT_2_C High 'MainMol' Ueq as Compared to Neighbors of   | C39 Check     |
| PLAT242_ALERT_2_C Low 'MainMol' Ueq as Compared to Neighbors of    | C27 Check     |
| PLAT242_ALERT_2_C Low 'MainMol' Ueq as Compared to Neighbors of    | C38 Check     |
| PLAT334_ALERT_2_C Small <C-C> Benzene Dist. C13 -C18 .             | 1.37 Ang.     |
| PLAT334_ALERT_2_C Small <C-C> Benzene Dist. C35 -C40 .             | 1.37 Ang.     |
| PLAT341_ALERT_3_C Low Bond Precision on C-C Bonds .....            | 0.01232 Ang.  |
| PLAT905_ALERT_3_C Negative K value in the Analysis of Variance ... | -2.142 Report |
| PLAT934_ALERT_3_C Number of (Iobs-Icalc)/Sigma(W) > 10 Outliers .. | 1 Check       |

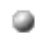

### Alert level G

|                                                                    |              |
|--------------------------------------------------------------------|--------------|
| PLAT398_ALERT_2_G Deviating C-O-C Angle From 120 for O1 .          | 109.6 Degree |
| PLAT606_ALERT_4_G Solvent Accessible VOID(S) in Structure .....    | ! Info       |
| PLAT794_ALERT_5_G Tentative Bond Valency for Fe1 (III) .           | 3.37 Info    |
| PLAT868_ALERT_4_G ALERTS Due to the Use of _smtbx_masks Suppressed | ! Info       |
| PLAT883_ALERT_1_G No Info/Value for _atom_sites_solution_primary . | Please Do !  |
| PLAT941_ALERT_3_G Average HKL Measurement Multiplicity .....       | 3.5 Low      |
| PLAT978_ALERT_2_G Number C-C Bonds with Positive Residual Density. | 0 Info       |

---

0 **ALERT level A** = Most likely a serious problem - resolve or explain  
1 **ALERT level B** = A potentially serious problem, consider carefully  
19 **ALERT level C** = Check. Ensure it is not caused by an omission or oversight  
7 **ALERT level G** = General information/check it is not something unexpected

3 ALERT type 1 CIF construction/syntax error, inconsistent or missing data  
10 ALERT type 2 Indicator that the structure model may be wrong or deficient  
8 ALERT type 3 Indicator that the structure quality may be low  
5 ALERT type 4 Improvement, methodology, query or suggestion  
1 ALERT type 5 Informative message, check

---

It is advisable to attempt to resolve as many as possible of the alerts in all categories. Often the minor alerts point to easily fixed oversights, errors and omissions in your CIF or refinement strategy, so attention to these fine details can be worthwhile. In order to resolve some of the more serious problems it may be necessary to carry out additional measurements or structure refinements. However, the purpose of your study may justify the reported deviations and the more serious of these should normally be commented upon in the discussion or experimental section of a paper or in the "special\_details" fields of the CIF. checkCIF was carefully designed to identify outliers and unusual parameters, but every test has its limitations and alerts that are not important in a particular case may appear. Conversely, the absence of alerts does not guarantee there are no aspects of the results needing attention. It is up to the individual to critically assess their own results and, if necessary, seek expert advice.

### **Publication of your CIF in IUCr journals**

A basic structural check has been run on your CIF. These basic checks will be run on all CIFs submitted for publication in IUCr journals (*Acta Crystallographica*, *Journal of Applied Crystallography*, *Journal of Synchrotron Radiation*); however, if you intend to submit to *Acta Crystallographica Section C* or *E* or *IUCrData*, you should make sure that full publication checks are run on the final version of your CIF prior to submission.

### **Publication of your CIF in other journals**

Please refer to the *Notes for Authors* of the relevant journal for any special instructions relating to CIF submission.

---

**PLATON version of 06/07/2023; check.def file version of 30/06/2023**

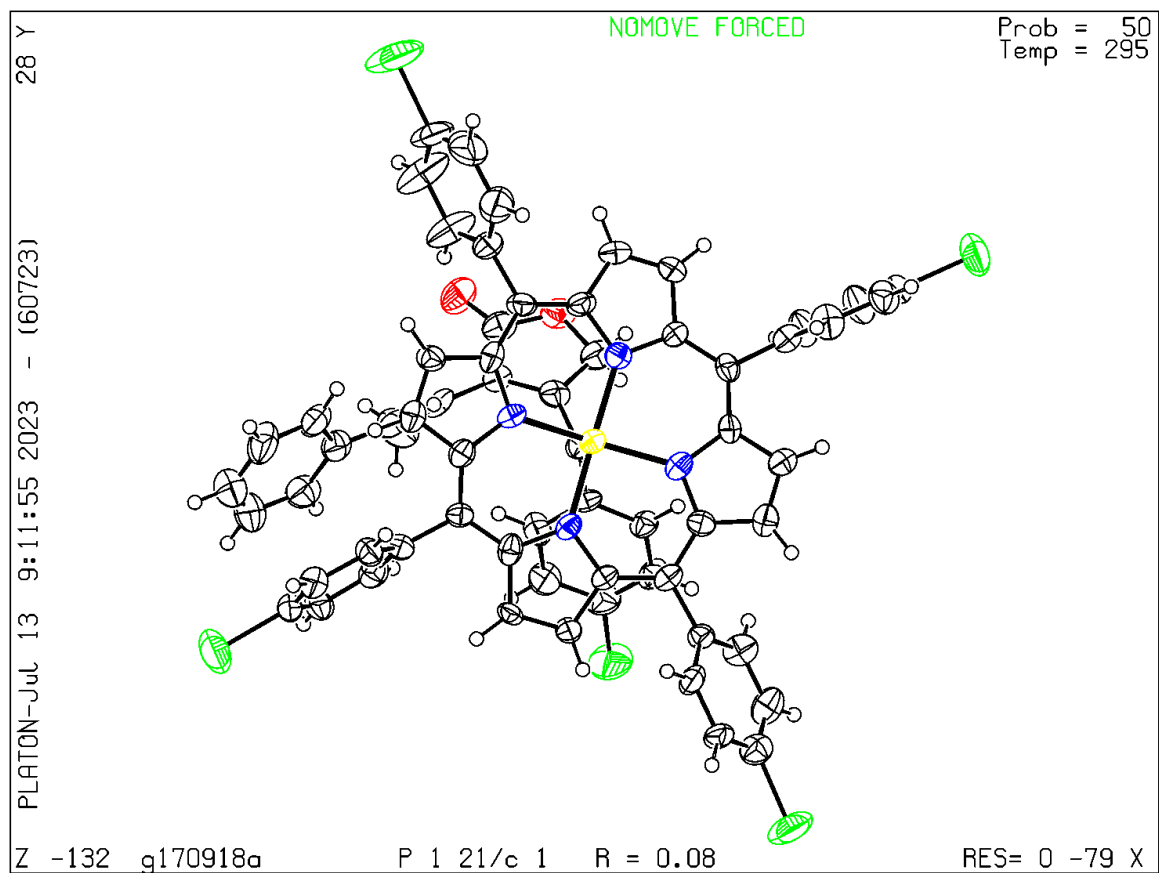

Supplement: Supplementary file 1 [file 0b27913d7cc189332d44acdc.pdf]
