# Supplementary material for: Iron-catalyzed carbene and carbene radical cascade reactions: Mechanistic study and synthetic applications
Source: Research Square preprint supplement (doi:10.21203/rs.3.rs-5669760/v1), 2025-01-30

## checkCIF/PLATON report

Structure factors have been supplied for datablock(s) zxx-20231019\_auto

THIS REPORT IS FOR GUIDANCE ONLY. IF USED AS PART OF A REVIEW PROCEDURE FOR PUBLICATION, IT SHOULD NOT REPLACE THE EXPERTISE OF AN EXPERIENCED CRYSTALLOGRAPHIC REFEREE.

No syntax errors found.      CIF dictionary      Interpreting this report

### Datablock: zxx-20231019\_auto

---

Bond precision:      C-C = 0.0067 Å

Wavelength=1.54184

Cell:                      a=9.9225(2)                      b=11.6881(3)                      c=15.1944(3)  
                              alpha=110.104(2)                      beta=102.399(2)                      gamma=100.788(2)  
Temperature:      100 K

|                        | Calculated    | Reported      |
|------------------------|---------------|---------------|
| Volume                 | 1549.40(7)    | 1549.39(6)    |
| Space group            | P -1          | P -1          |
| Hall group             | -P 1          | -P 1          |
| Moiety formula         | C20 H15 Br O2 | C20 H15 Br O2 |
| Sum formula            | C20 H15 Br O2 | C20 H15 Br O2 |
| Mr                     | 367.22        | 367.23        |
| Dx, g cm <sup>-3</sup> | 1.574         | 1.574         |
| Z                      | 4             | 4             |
| Mu (mm <sup>-1</sup> ) | 3.670         | 3.670         |
| F000                   | 744.0         | 744.0         |
| F000'                  | 743.06        |               |
| h,k,lmax               | 11,13,17      | 11,13,17      |
| Nref                   | 5283          | 5193          |
| Tmin,Tmax              | 0.676,0.746   | 0.592,1.000   |
| Tmin'                  | 0.549         |               |

Correction method= # Reported T Limits: Tmin=0.592 Tmax=1.000  
AbsCorr = MULTI-SCAN

Data completeness= 0.983

Theta(max)= 65.089

R(reflections)= 0.0541( 4479)

wR2(reflections)=  
0.1412( 5193)

S = 1.052

Npar= 415

---

The following ALERTS were generated. Each ALERT has the format

**test-name\_ALERT\_alert-type\_alert-level.**

Click on the hyperlinks for more details of the test.

---

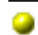

### Alert level C

THETM01\_ALERT\_3\_C The value of sine(theta\_max)/wavelength is less than 0.590  
Calculated sin(theta\_max)/wavelength = 0.5882

PLAT341\_ALERT\_3\_C Low Bond Precision on C-C Bonds ..... 0.00675 Ang.

PLAT790\_ALERT\_4\_C Centre of Gravity not Within Unit Cell: Resd. # 1 Note  
C20 H15 Br O2

PLAT906\_ALERT\_3\_C Large K Value in the Analysis of Variance ..... 4.048 Check

PLAT911\_ALERT\_3\_C Missing FCF Refl Between Thmin & STh/L= 0.588 90 Report

|       |    |      |       |     |     |       |     |     |      |     |       |      |      |      |     |     |     |
|-------|----|------|-------|-----|-----|-------|-----|-----|------|-----|-------|------|------|------|-----|-----|-----|
| -11   | 1  | 0,   | -7    | 12  | 0,  | -2    | 12  | 0,  | 2-13 | 1,  | 3-13  | 1,   | 4-13 | 1,   |     |     |     |
| 10    | -9 | 1,   | -9    | -5  | 1,  | 11    | -3  | 1,  | 11   | -2  | 1,    | 10   | -1   | 1,   |     |     |     |
| 5     | 6  | 1,   | 6     | 8   | 1,  | -1    | 10  | 1,  | -2   | 11  | 1,    | 1-13 | 2,   | 2-13 | 2,  |     |     |
| 3-13  | 2, | 9-10 | 2,    | 11  | -5  | 2,    | -11 | -1  | 2,   | 10  | 0     | 2,   | -9   | 10   | 2,  |     |     |
| -3    | 12 | 2,   | -10   | -4  | 3,  | 10    | -1  | 3,  | 10   | 0   | 3,    | 8    | 3    | 3,   | 4   | 4   | 3,  |
| 8     | 4  | 3,   | 0     | 6   | 3,  | -3-12 | 4,  | 10  | -2   | 4,  | 10    | -1   | 4,   | 7    | 5   | 4,  |     |
| -2    | -9 | 5,   | -1    | -9  | 5,  | -2    | -8  | 5,  | 10   | -7  | 5,    | 10   | -3   | 5,   | -11 | -2  | 5,  |
| -11   | -1 | 5,   | -11   | 6   | 5,  | -4    | 11  | 5,  | -3   | 11  | 5,    | 6    | 5    | 6,   | 3   | 8   | 6,  |
| -6-10 | 7, | -7   | -9    | 7,  | 8   | 1     | 7,  | -4  | 10   | 7,  | -5-10 | 8,   | 9    | -5   | 8,  |     |     |
| -11   | 3  | 8,   | 5     | 4   | 8,  | 2     | 7   | 8,  | 0    | 0   | 9,    | 7-10 | 10,  | 8    | -6  | 10, |     |
| -10   | -4 | 10,  | 4     | 4   | 10, | 3     | 5   | 10, | 2-13 | 11, | -10   | -3   | 11,  | 7    | -3  | 11, |     |
| -10   | -2 | 11,  | -5    | 7   | 11, | -10   | -2  | 12, | -10  | -1  | 12,   | 5    | 0    | 12,  | -6  | 6   | 12, |
| -5    | 6  | 12,  | -1-12 | 13, | -9  | -4    | 13, | -9  | 1    | 13, | -6    | 5    | 13,  | -5   | 5   | 13, |     |
| 4     | -8 | 14,  | 5     | -5  | 14, | -7    | 3   | 14, | -4   | 4   | 14,   | -4   | -9   | 15,  | -7  | -6  | 15, |
| 4     | -6 | 15,  | 4     | -5  | 15, | 2     | -3  | 16, | -6   | 0   | 16,   | -5   | 1    | 16,  | 1   | -5  | 17, |

PLAT971\_ALERT\_2\_C Check Calcd Resid. Dens. 0.90Ang From Br22 1.84 eA-3

PLAT977\_ALERT\_2\_C Check Negative Difference Density on H3 . -0.32 eA-3

---

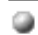

### Alert level G

PLAT083\_ALERT\_2\_G SHELXL Second Parameter in WGHT Unusually Large 5.97 Why ?

PLAT154\_ALERT\_1\_G The s.u.'s on the Cell Angles are Equal ..(Note) 0.002 Degree

PLAT398\_ALERT\_2\_G Deviating C-O-C Angle From 120 for O9 . 109.2 Degree

PLAT398\_ALERT\_2\_G Deviating C-O-C Angle From 120 for O32 . 109.6 Degree

PLAT432\_ALERT\_2\_G Short Inter X...Y Contact Br22 ..C35 . 3.29 Ang.

x,y,z = 1\_555 Check

PLAT793\_ALERT\_4\_G Model has Chirality at C6 (Centro SpGr) R Verify

PLAT793\_ALERT\_4\_G Model has Chirality at C29 (Centro SpGr) R Verify

PLAT909\_ALERT\_3\_G Percentage of I>2sig(I) Data at Theta(Max) Still 76% Note

PLAT933\_ALERT\_2\_G Number of HKL-OMIT Records in Embedded .res File 4 Note

4 4 3, 10 -1 1, 10 -1 3, 10 0 2,

PLAT941\_ALERT\_3\_G Average HKL Measurement Multiplicity ..... 2.9 Low

PLAT969\_ALERT\_5\_G The 'Henn et al.' R-Factor-gap value ..... 2.500 Note

Predicted wR2: Based on SigI\*\*2 5.65 or SHELX Weight 13.42

PLAT978\_ALERT\_2\_G Number C-C Bonds with Positive Residual Density. 1 Info

---

- 0 **ALERT level A** = Most likely a serious problem - resolve or explain
- 0 **ALERT level B** = A potentially serious problem, consider carefully
- 7 **ALERT level C** = Check. Ensure it is not caused by an omission or oversight
- 12 **ALERT level G** = General information/check it is not something unexpected

1 ALERT type 1 CIF construction/syntax error, inconsistent or missing data

8 ALERT type 2 Indicator that the structure model may be wrong or deficient  
6 ALERT type 3 Indicator that the structure quality may be low  
3 ALERT type 4 Improvement, methodology, query or suggestion  
1 ALERT type 5 Informative message, check

---

---

It is advisable to attempt to resolve as many as possible of the alerts in all categories. Often the minor alerts point to easily fixed oversights, errors and omissions in your CIF or refinement strategy, so attention to these fine details can be worthwhile. In order to resolve some of the more serious problems it may be necessary to carry out additional measurements or structure refinements. However, the purpose of your study may justify the reported deviations and the more serious of these should normally be commented upon in the discussion or experimental section of a paper or in the "special\_details" fields of the CIF. checkCIF was carefully designed to identify outliers and unusual parameters, but every test has its limitations and alerts that are not important in a particular case may appear. Conversely, the absence of alerts does not guarantee there are no aspects of the results needing attention. It is up to the individual to critically assess their own results and, if necessary, seek expert advice.

### **Publication of your CIF in IUCr journals**

A basic structural check has been run on your CIF. These basic checks will be run on all CIFs submitted for publication in IUCr journals (*Acta Crystallographica*, *Journal of Applied Crystallography*, *Journal of Synchrotron Radiation*); however, if you intend to submit to *Acta Crystallographica Section C* or *E* or *IUCrData*, you should make sure that full publication checks are run on the final version of your CIF prior to submission.

### **Publication of your CIF in other journals**

Please refer to the *Notes for Authors* of the relevant journal for any special instructions relating to CIF submission.

---

**PLATON version of 22/08/2024; check.def file version of 21/08/2024**

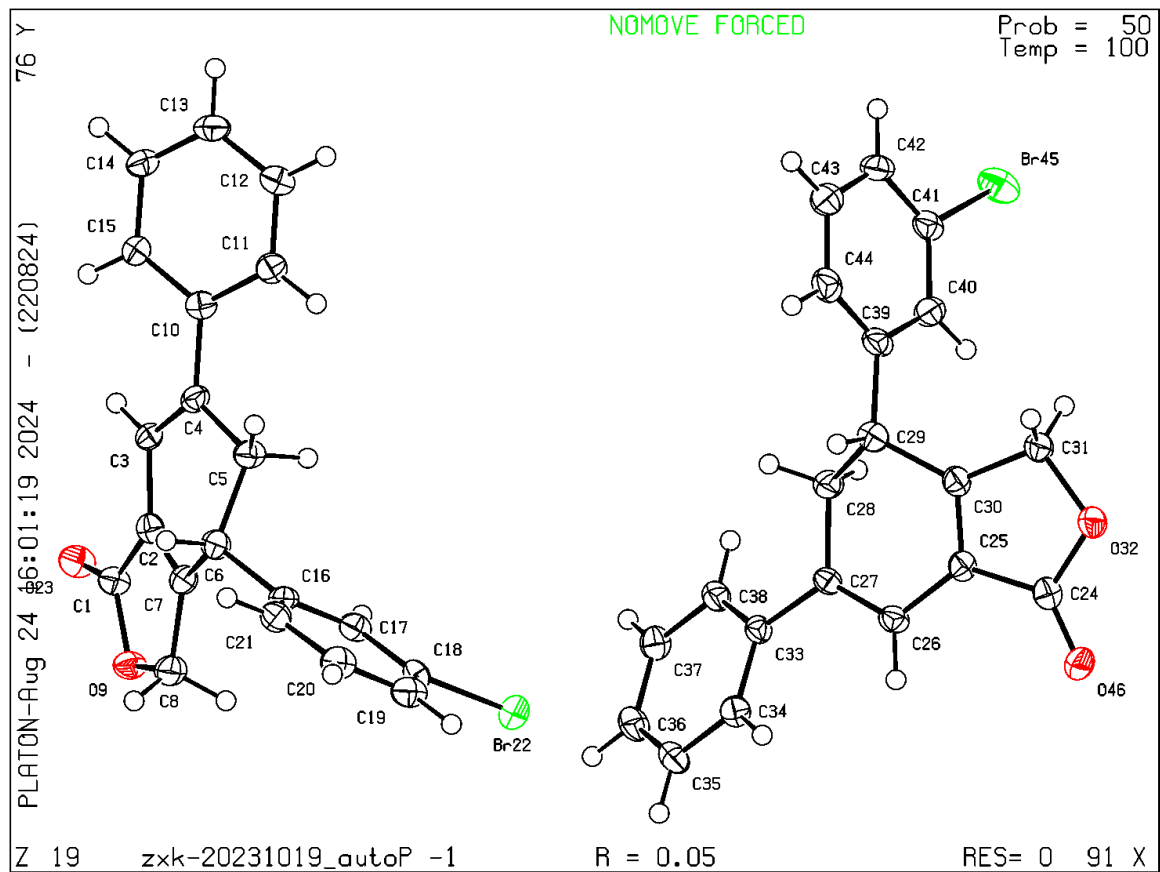

Supplement: Supplementary file 2 [file 20ff4d6f216b7eb00a27742c.pdf]
