# Supplementary material for: Iron-catalyzed carbene and carbene radical cascade reactions: Mechanistic study and synthetic applications
Source: Research Square preprint supplement (doi:10.21203/rs.3.rs-5669760/v1), 2025-01-30

## checkCIF/PLATON report

Structure factors have been supplied for datablock(s) zxc-20240425-drxlys-3\_auto

THIS REPORT IS FOR GUIDANCE ONLY. IF USED AS PART OF A REVIEW PROCEDURE FOR PUBLICATION, IT SHOULD NOT REPLACE THE EXPERTISE OF AN EXPERIENCED CRYSTALLOGRAPHIC REFEREE.

No syntax errors found. CIF dictionary Interpreting this report

## Datablock: zyk-20240425-drxlys-3\_auto

Bond precision: C-C = 0.0158 Å

Wavelength=1.54184

```
Cell:      a=9.6930(4)
           alpha=87.001(2)
```

b=9.7666(3)      c=14.6505(4)  
beta=86.137(3)      gamma=75.644(3)

Temperature: 100 K

|                | Calculated    |
|----------------|---------------|
| Volume         | 1339.66 (8)   |
| Space group    | P -1          |
| Hall group     | -P 1          |
| Moiety formula | C18 H11 Br O2 |
| Sum formula    | C18 H11 Br O2 |
| Mr             | 339.17        |
| Dx, g cm-3     | 1.682         |
| Z              | 4             |
| Mu (mm-1)      | 4.190         |
| F000           | 680.0         |
| F000'          | 678.93        |
| h, k, lmax     | 11, 11, 17    |
| Nref           | 4754          |
| Tmin, Tmax     | 0.288, 0.433  |
| Tmin'          | 0.185         |

Reported  
1339.66(8)  
P -1  
-P 1  
2(C18 H11 Br O2)  
C36 H22 Br2 O4  
678.35  
1.682  
2  
4.190  
680.0  
  
11,11,17  
4732  
0.676,1.000

```
Correction method= # Reported T Limits: Tmin=0.676 Tmax=1.000
AbsCorr = MULTI-SCAN
```

Data completeness= 0.995

$$\text{Theta (max)} = 66.592$$

R(reflections)= 0.1056( 4084)

```
wR2 (reflections)=  
0.2837 ( 4732)
```

$$S = 1.190$$

Npar= 379

---

The following ALERTS were generated. Each ALERT has the format

**test-name\_ALERT\_alert-type\_alert-level.**

Click on the hyperlinks for more details of the test.

---

### Alert level B

PLAT341\_ALERT\_3\_B Low Bond Precision on C-C Bonds ..... 0.01585 Ang.

**Author Response: This is likely related to the weak diffraction of the crystal.**

---

### Alert level C

|                                                                   |              |
|-------------------------------------------------------------------|--------------|
| PLAT042_ALERT_1_C Calc. and Reported MoietyFormula Strings Differ | Please Check |
| Calc: C18 H11 Br O2                                               |              |
| Rep.: 2(C18 H11 Br O2)                                            |              |
| PLAT082_ALERT_2_C High R1 Value .....                             | 0.11 Report  |
| PLAT084_ALERT_3_C High wR2 Value (i.e. > 0.25) .....              | 0.28 Report  |
| PLAT906_ALERT_3_C Large K Value in the Analysis of Variance ..... | 16.781 Check |
| PLAT906_ALERT_3_C Large K Value in the Analysis of Variance ..... | 2.667 Check  |
| PLAT911_ALERT_3_C Missing FCF Refl Between Thmin & STh/L= 0.595   | 22 Report    |
| 8 -4 1, 1 2 1, 4 3 2, 6 11 2, 1 0 3, 6 11 3,                      |              |
| 2 3 4, -1 10 5, -7 6 6, -5 8 6, -9 2 7, 5 10 8,                   |              |
| 4 -5 9, 8 -3 9, 3 8 11, -5 -3 12, -5 -4 13, -5 2 13,              |              |
| 7 2 13, 1 8 13, 7 3 14, -3 2 16,                                  |              |
| PLAT971_ALERT_2_C Check Calcd Resid. Dens. 1.00Ang From O42       | 2.32 eA-3    |
| PLAT971_ALERT_2_C Check Calcd Resid. Dens. 1.12Ang From Br20      | 2.25 eA-3    |
| PLAT971_ALERT_2_C Check Calcd Resid. Dens. 0.99Ang From Br41      | 2.08 eA-3    |
| PLAT971_ALERT_2_C Check Calcd Resid. Dens. 1.07Ang From Br20      | 1.98 eA-3    |
| PLAT971_ALERT_2_C Check Calcd Resid. Dens. 0.92Ang From Br41      | 1.81 eA-3    |
| PLAT972_ALERT_2_C Check Calcd Resid. Dens. 1.03Ang From Br20      | -1.93 eA-3   |
| PLAT975_ALERT_2_C Check Calcd Resid. Dens. 0.92Ang From O21 .     | 0.73 eA-3    |

---

### Alert level G

|                                                                    |               |
|--------------------------------------------------------------------|---------------|
| PLAT003_ALERT_2_G Number of Uiso or Uij Restrained non-H Atoms ... | 42 Report     |
| PLAT045_ALERT_1_G Calculated and Reported Z Differ by a Factor ... | 2 Check       |
| PLAT083_ALERT_2_G SHELXL Second Parameter in WGHT Unusually Large  | 34.71 Why ?   |
| PLAT187_ALERT_4_G The CIF-Embedded .res File Contains RIGU Records | 2 Report      |
| PLAT190_ALERT_3_G A Non-default RIGU Restraint Value for First Par | 0.0100 Report |
| PLAT190_ALERT_3_G A Non-default RIGU Restraint Value for SecondPar | 0.0200 Report |
| PLAT398_ALERT_2_G Deviating C-O-C Angle From 120 for O34 .         | 110.0 Degree  |
| PLAT432_ALERT_2_G Short Inter X...Y Contact O13 ..C33 .            | 2.84 Ang.     |
| x,y,z = 1_555 Check                                                |               |
| PLAT860_ALERT_3_G Number of Least-Squares Restraints .....         | 354 Note      |
| PLAT909_ALERT_3_G Percentage of I>2sig(I) Data at Theta(Max) Still | 69% Note      |
| PLAT930_ALERT_2_G FCF-based Twin Law ( 1-1 0) Est.d BASF           | 0.10 Check    |
| PLAT931_ALERT_5_G CIFcalcFCF Twin Law ( 1-1 0) Est.d BASF          | 0.10 Check    |
| PLAT933_ALERT_2_G Number of HKL-OMIT Records in Embedded .res File | 7 Note        |
| 1 0 3, 1 2 1, 2 3 4, 3 8 11, 3 11 7, 4 3 2,                        |               |
| 5 10 8,                                                            |               |
| PLAT941_ALERT_3_G Average HKL Measurement Multiplicity .....       | 4.8 Low       |
| PLAT969_ALERT_5_G The 'Henn et al.' R-Factor-gap value .....       | 5.18 Note     |
| Predicted wR2: Based on SigI**2 5.47 or SHELX Weight 24.85         |               |

---

0 **ALERT level A** = Most likely a serious problem - resolve or explain  
1 **ALERT level B** = A potentially serious problem, consider carefully  
13 **ALERT level C** = Check. Ensure it is not caused by an omission or oversight  
16 **ALERT level G** = General information/check it is not something unexpected

2 ALERT type 1 CIF construction/syntax error, inconsistent or missing data  
15 ALERT type 2 Indicator that the structure model may be wrong or deficient  
10 ALERT type 3 Indicator that the structure quality may be low  
1 ALERT type 4 Improvement, methodology, query or suggestion  
2 ALERT type 5 Informative message, check

---

---

It is advisable to attempt to resolve as many as possible of the alerts in all categories. Often the minor alerts point to easily fixed oversights, errors and omissions in your CIF or refinement strategy, so attention to these fine details can be worthwhile. In order to resolve some of the more serious problems it may be necessary to carry out additional measurements or structure refinements. However, the purpose of your study may justify the reported deviations and the more serious of these should normally be commented upon in the discussion or experimental section of a paper or in the "special\_details" fields of the CIF. checkCIF was carefully designed to identify outliers and unusual parameters, but every test has its limitations and alerts that are not important in a particular case may appear. Conversely, the absence of alerts does not guarantee there are no aspects of the results needing attention. It is up to the individual to critically assess their own results and, if necessary, seek expert advice.

### Publication of your CIF in IUCr journals

A basic structural check has been run on your CIF. These basic checks will be run on all CIFs submitted for publication in IUCr journals (*Acta Crystallographica*, *Journal of Applied Crystallography*, *Journal of Synchrotron Radiation*); however, if you intend to submit to *Acta Crystallographica Section C* or *E* or *IUCrData*, you should make sure that full publication checks are run on the final version of your CIF prior to submission.

### Publication of your CIF in other journals

Please refer to the *Notes for Authors* of the relevant journal for any special instructions relating to CIF submission.

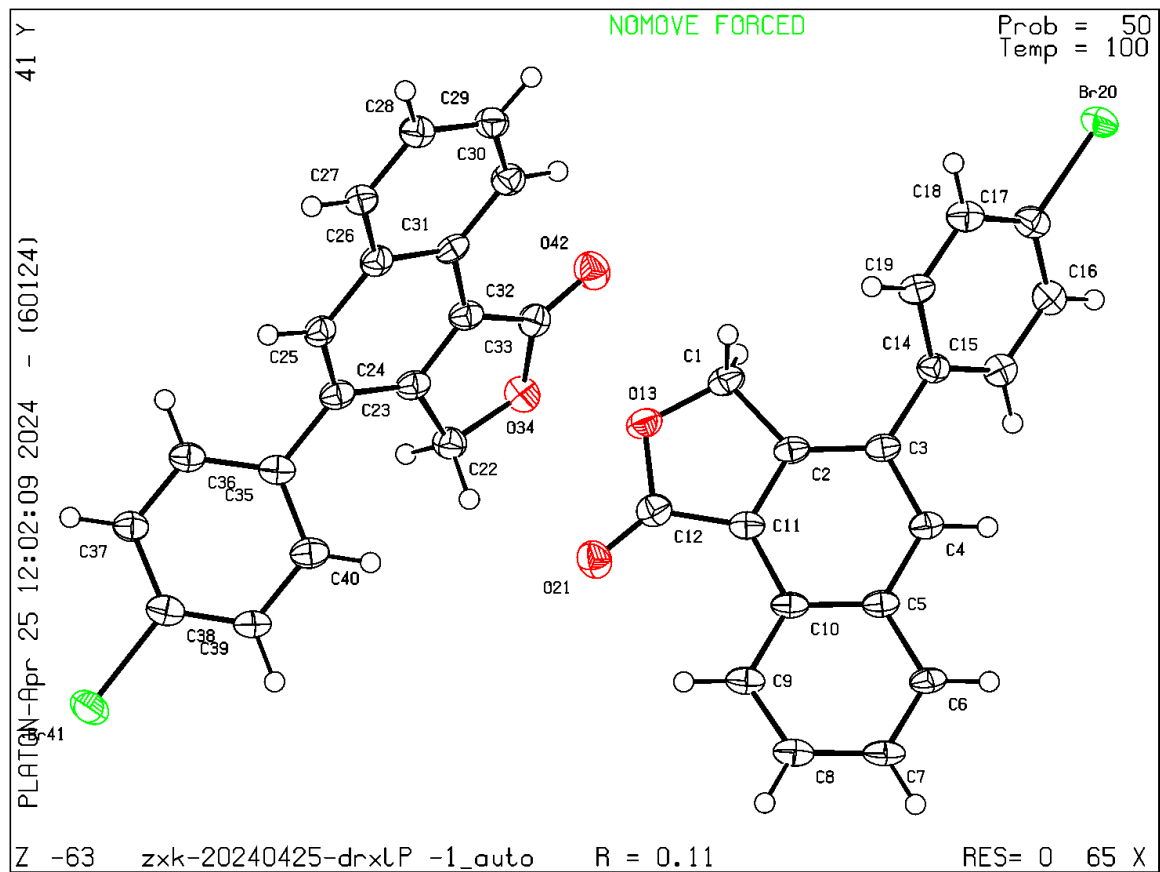

Supplement: Supplementary file 5 [file e7905d91ae6f6451b895cd9c.pdf]
